# Supplementary material for: Solid state transformations in stoichiometric hydrogen bonded molecular salts: ionic interconversion and dehydration processes
Source: Royal Society of Chemistry journal article supplement (doi:10.1039/c3ce40614h), 2013-01-01
Supplement: c3ce40614h.pdf [file c3ce40614h.pdf]

# Supporting Information: Solid state transformations in stoichiometric hydrogen bonded molecular salts: ionic interconversion and dehydration processes.

Fang Guo,<sup>\*a</sup> Ming-Qian Zhang,<sup>a</sup> Antonino Famulari,<sup>b</sup> Javier Martí-Rujas<sup>\*c</sup>

## Contents

### 1. Experimental Details

**Figure S1.** Comparison of XRPD patterns between bulk sample (black) of  $A_1B_1$  and its simulated XRPD from single crystal (red).

**Figure S2.** Comparison of XRPD patterns between bulk sample (black) of  $A_1B_2 \cdot H_2O$  and its simulated XRPD from single crystal (red).

**Figure S3.** (a) Experimental XRPD pattern of  $A_1B_1$  obtained after grinding  $A \cdot 2H_2O$  and  $B$  (1:1); (b)  $A_1B_1$  simulated XRPD from single crystal; (c) experimental XRPD after adding 1 mol of  $B$  to  $A_1B_1$  and subsequent grinding; (d)  $A_1B_2 \cdot H_2O$  simulated XRPD from single crystal; and (e) experimental XRPD after adding and grinding one mol of  $A \cdot 2H_2O$  to  $A_1B_2 \cdot H_2O$ . We note that there is a small amount of unreacted  $A_1B_1$  in interconverted  $A_1B_2 \cdot H_2O$ .

**Figure S4.** TG plot corresponding to  $A_1B_2 \cdot H_2O$ .

**Figure S5.** Photographs of  $A_1B_2 \cdot H_2O$  taken before and after heating to 120 °C in a furnace for *ca.* 24 mins. The clear change in the transparency indicates that a major structural transformation due to the release of water has taken place. This is corroborated by single crystal X-ray diffraction analysis.

**Figure S6.** (a) Photograph of  $A_1B_2 \cdot H_2O$  taken after heating to 120 °C *ca.* 20 mins. The white areas (arrows) indicate that release of water occurred and a microcrystalline solid has formed. Note that the central part is more transparent, thus denoting that still there is parent crystal  $A_1B_2 \cdot H_2O$ . (b) The same crystal after being covered by a small amount of methanol (*i.e.*; 100  $\mu$ l dropped onto the crystals) and left it overnight. (c) The same crystal viewed from the bottom. (d) A second crystal also after being heated and exposed to methanol shows the growth of larger needles of anhydrous crystal  $A_1B_2$ .

**Figure S7.** Simulated vs experimental XRPD patterns of  $A_1B_2$ .

**Figure S8.** At top, simulated from single crystal data powder diffraction pattern of  $A_1B_2 \cdot H_2O$ . Bottom, powder diffraction pattern of  $A_1B_2$  after exposing it to vapors of  $H_2O$  for two days. Clearly, in  $A_1B_2$  adsorption of  $H_2O$  takes place as shown by the good match between both diffraction patterns.

**Table S1.** Hydrogen bonding geometries in the crystal structures of the molecular salts **A<sub>1</sub>B<sub>1</sub>**, **A<sub>1</sub>B<sub>2</sub>•H<sub>2</sub>O** and **A<sub>1</sub>B<sub>2</sub>**.

## **2. CheckCIF/PLATON**

## 1. Experimental Details

Commercial HPLC-grade solvents were used without further purification. All the reagents were commercially available and used without *any* further purification.

X-Ray powder diffraction (XRPD) patterns were recorded on a Bruker D8 diffractometer (reflection mode; at 40 kV, 100 mA for a Cu-target tube ( $\lambda = 1.5406 \text{ \AA}$ ) and a graphite monochromator;  $2\theta$  range  $5^\circ - 40^\circ$ ; step size  $0.02^\circ$ ; total data collection time 10 min.

TGA measurements were carried out in a **DTG-60H/DSC-60**, SHIMADZU, Japan instrument. The heating rate was  $10^\circ\text{C}/\text{min}$  and the measurement was from RT to  $700^\circ\text{C}$ .

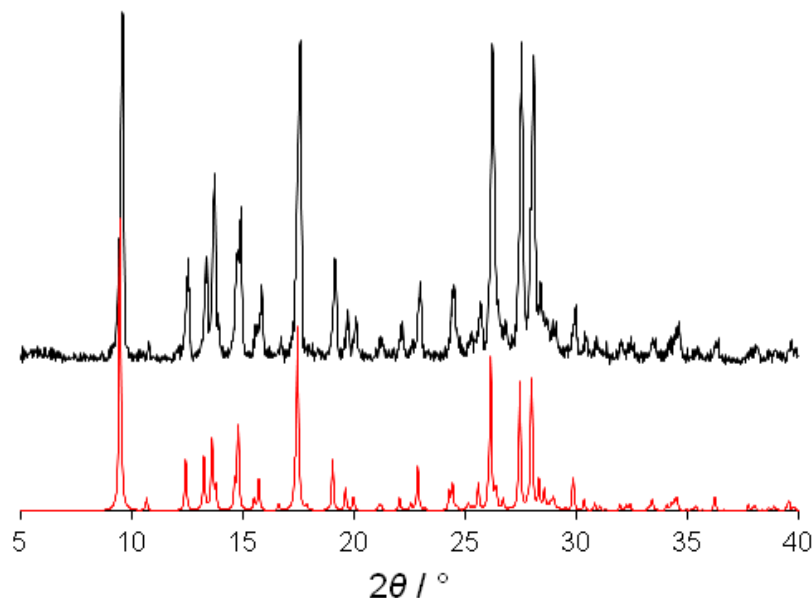

**Figure S1.** Comparison of XRPD patterns between bulk sample (black) of  $A_1B_1$  and its simulated XRPD from single crystal (red).

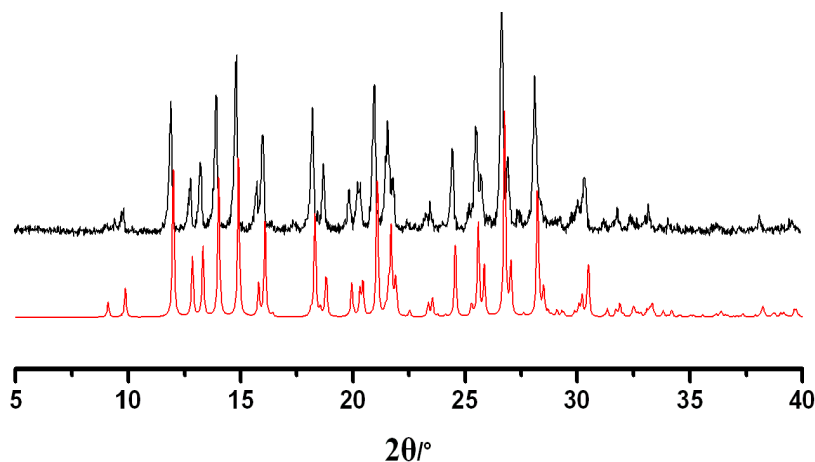

**Figure S2.** Comparison of XRPD patterns between bulk sample (black) of  $A_1B_2 \cdot H_2O$  and its simulated XRPD from single crystal (red).

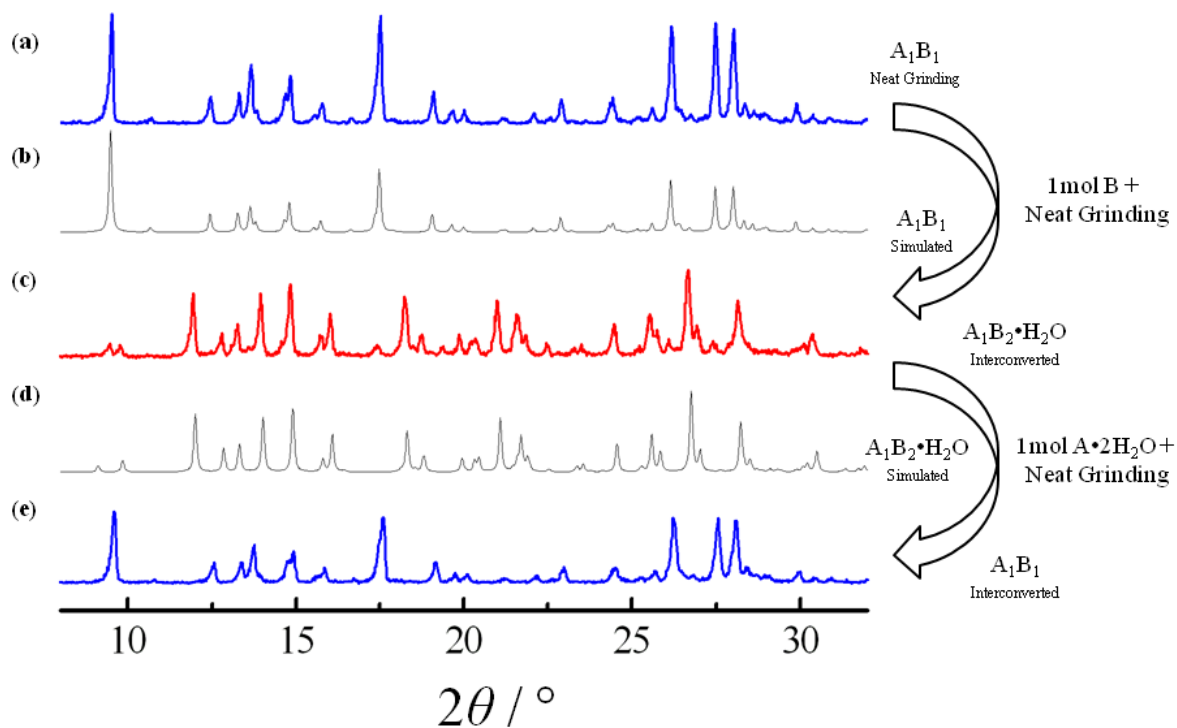

**Figure S3.** (a) Experimental XRPD pattern of  $A_1B_1$  obtained after grinding  $A \cdot 2H_2O$  and  $B$  (1:1); (b)  $A_1B_1$  simulated XRPD from single crystal; (c) experimental XRPD after adding 1 mol of  $B$  to  $A_1B_1$  and subsequent grinding; (d)  $A_1B_2 \cdot H_2O$  simulated XRPD from single crystal; and (e) experimental XRPD after adding and grinding one mol of  $A \cdot 2H_2O$  to  $A_1B_2 \cdot H_2O$ . We note that there is a small amount of unreacted  $A_1B_1$  in interconverted  $A_1B_2 \cdot H_2O$ .

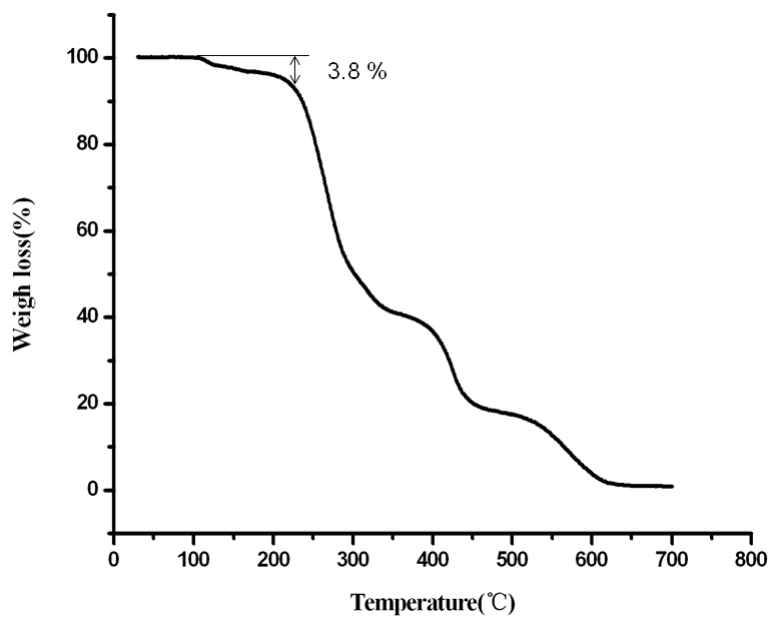

**Figure S4.** TG plot corresponding to  $A_1B_2 \cdot H_2O$ .

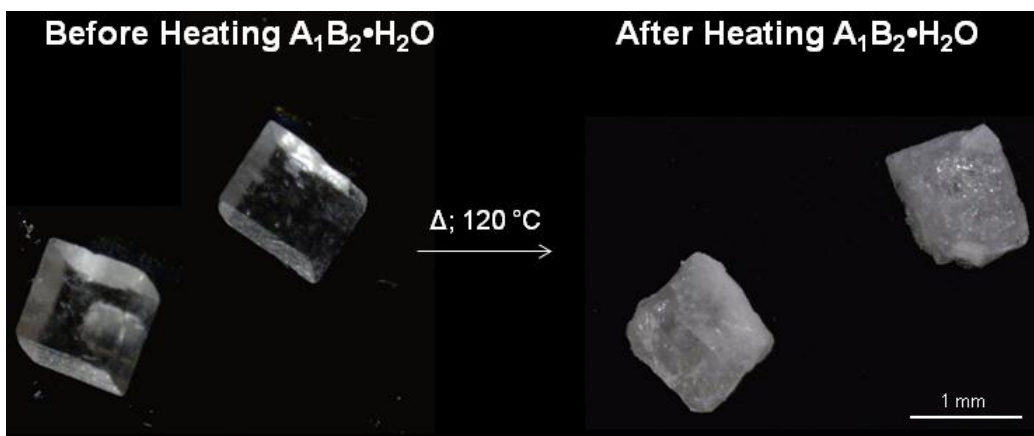

**Figure S5.** Photographs of  $A_1B_2 \cdot H_2O$  taken before and after heating to 120 °C in a furnace for *ca.* 24 mins. The clear change in the transparency indicates that a major structural transformation due to the release of water has taken place. This is corroborated by single crystal X-ray diffraction analysis.

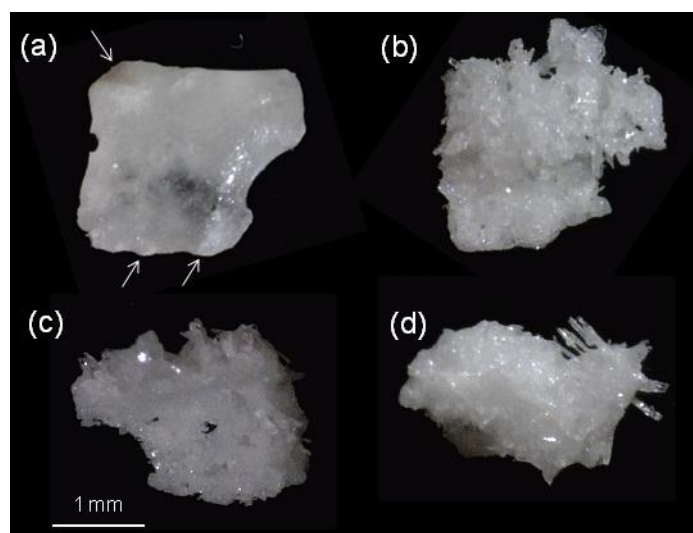

**Figure S6.** (a) Photograph of  $A_1B_2 \cdot H_2O$  taken after heating to 120 °C *ca.* 20 mins. The white areas (arrows) indicate that release of water occurred and a microcrystalline solid has formed. Note that the central part is more transparent, thus denoting that still there is parent crystal  $A_1B_2 \cdot H_2O$ . (b) The same crystal after being covered by a small amount of methanol (*i.e.*; 100  $\mu$ l dropped onto the crystals) and left it overnight. (c) The same crystal viewed from the bottom. (d) A second crystal also after being heated and exposed to methanol shows the growth of larger needles of anhydrous crystal  $A_1B_2$ .

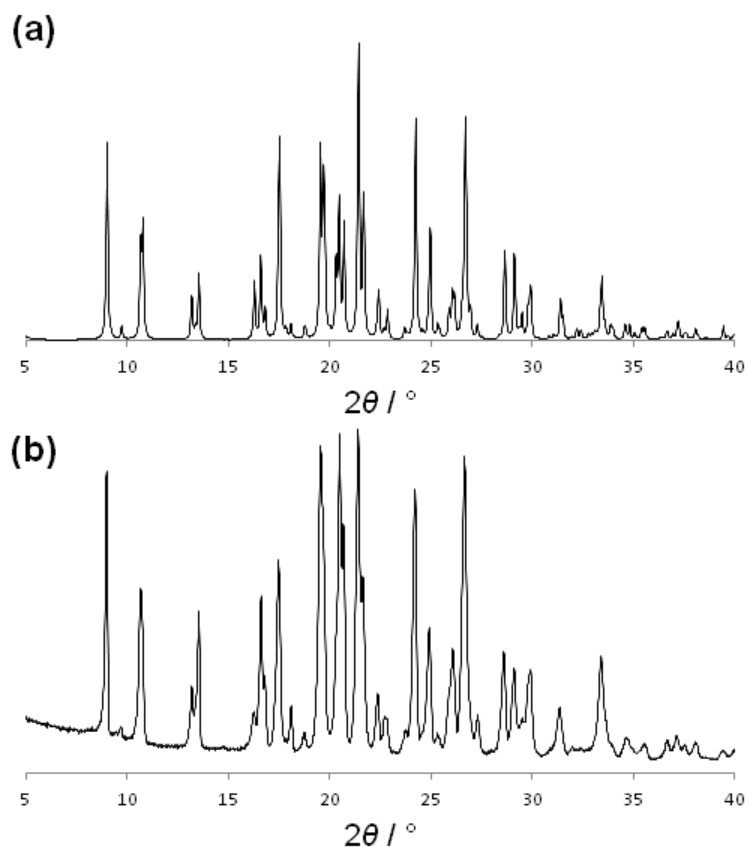

**Figure S7.** Simulated vs experimental XRPD patterns of  $A_1B_2$ .

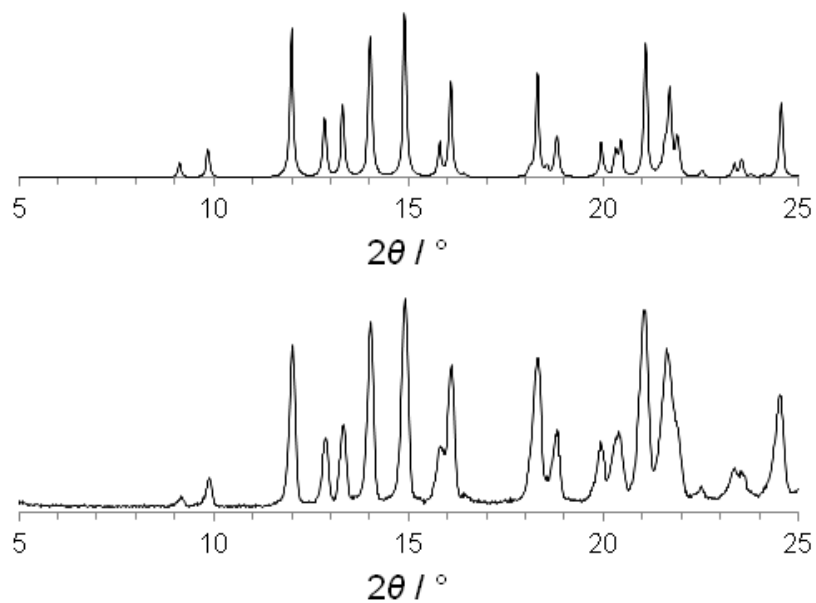

**Figure S8.** At top, simulated from single crystal data powder diffraction pattern of  $A_1B_2 \cdot H_2O$ . Bottom, powder diffraction pattern of  $A_1B_2$  after exposing it to vapors of  $H_2O$  for two days. Clearly, in  $A_1B_2$  adsorption of  $H_2O$  takes place as shown by the good match between both diffraction patterns.

**Table S1.** Hydrogen bonding geometries in the crystal structures of the molecular salts **A<sub>1</sub>B<sub>1</sub>**, **A<sub>1</sub>B<sub>2</sub>•H<sub>2</sub>O** and **A<sub>1</sub>B<sub>2</sub>**.

|                                                  | <b>D...A (Å)</b> | <b>H...A (Å)</b> | <b>D-H...A (°)</b> | <b>Symmetry Code</b> |
|--------------------------------------------------|------------------|------------------|--------------------|----------------------|
| <b>A<sub>1</sub>B<sub>1</sub></b>                |                  |                  |                    |                      |
| i. N1-H1A...O3                                   | 2.889            | 2.122            | 148.2              | x,y,z                |
| ii. N2-H2A...O2                                  | 2.954            | 2.110            | 166.8              | x,y,z                |
| iii. O5-H2...O2                                  | 2.738            | 1.860            | 176.4              | -1-x,-1/2+y,1/2-z    |
| iv. O6-H3...O1                                   | 2.849            | 2.259            | 121.4              | -1-x,-1-y,1-z        |
| <b>A<sub>1</sub>B<sub>2</sub>•H<sub>2</sub>O</b> |                  |                  |                    |                      |
| i. N3-H3N...O3                                   | 2.737            | 1.940            | 153.6              | x-1,1+y,z            |
| ii. N4-H4N...O5                                  | 2.673            | 1.820            | 171.5              | x,y,z                |
| iii. O1w-H2w...O5                                | 2.672            | 1.805            | 175.8              | x,y,z                |
| iv. N1-H1...O1w                                  | 2.627            | 1.778            | 169.3              | 1-x, 2-y,-z          |
| v. O1w-H1w...O1                                  | 2.756            | 1.994            | 166.4              | 1-x,1-y,-z           |
| vi. N2-H2N...O2                                  | 2.706            | 1.887            | 158.9              | x-1,1+y,z            |
| <b>A<sub>1</sub>B<sub>2</sub></b>                |                  |                  |                    |                      |
| i. N2-H2...O3                                    | 2.733            | 1.895            | 164.4              | x, y, z              |
| ii. N1-H1...O5                                   | 2.692            | 1.874            | 158.2              | 1-x,y-1/2,1/2-z      |
| iii. N3-H3...O6                                  | 2.667            | 1.699            | 170.1              | 1-x,1-y,1-z          |
| iv. N4-H4...O2                                   | 2.716            | 1.864            | 170.8              | x, y, z              |

## 2. CheckCIF/PLATON

# checkCIF/PLATON (standard)

---

Structure factors have been supplied for datablock(s) 1

No syntax errors found.

Please wait while processing ....

[CIF dictionary](#)

[Interpreting this report](#)

## Datablock: A1B1

---

Bond precision: C-C = 0.0028 Å Wavelength=0.71073

Cell: a=7.8714 (5) b=16.5514 (11) c=13.6543 (7)

alpha=90 beta=124.464 (3) gamma=90

Temperature: 293 K

|                        | Calculated           | Reported        |
|------------------------|----------------------|-----------------|
| Volume                 | 1466.69(16)          | 1466.69(15)     |
| Space group            | P 21/c               | P21/c           |
| Hall group             | -P 2ybc              | ?               |
| Moiety formula         | C7 H5 O6 S, C7 H7 N2 | ?               |
| Sum formula            | C14 H12 N2 O6 S      | C14 H12 N2 O6 S |
| Mr                     | 336.33               | 336.33          |
| Dx, g cm <sup>-3</sup> | 1.523                | 1.523           |
| Z                      | 4                    | 4               |
| Mu (mm <sup>-1</sup> ) | 0.255                | 0.255           |
| F000                   | 696.0                | 696.0           |
| F000'                  | 696.88               |                 |
| h, k, lmax             | 10, 21, 17           | 10, 21, 17      |
| Nref                   | 3354                 | 3345            |
| Tmin, Tmax             | 0.950, 0.950         |                 |



Tmin' 0.950  
Correction method= Not given  
Data completeness= 0.997 Theta (max)= 27.460  
R(reflections)= 0.0416( 3020) wR2(reflections)= 0.1048( 3345)  
S = 1.014 Npar= 208

---

The following ALERTS were generated. Each ALERT has the format  
**test-name\_ALERT\_alert-type\_alert-level**.  
Click on the hyperlinks for more details of the test.

---

### ● Alert level B

[PLAT052\\_ALERT\\_1\\_B](#) Info on Absorption Correction Method Missing ...  
?

---

### ● Alert level C

[PLAT250\\_ALERT\\_2\\_C](#) Large U3/U1 Ratio for Average U(i,j) Tensor ....  
2.4  
[PLAT790\\_ALERT\\_4\\_C](#) Centre of Gravity not Within Unit Cell: Resd. #  
1  
C7 H5 O6 S

---

### ● Alert level G

[PLAT005\\_ALERT\\_5\\_G](#) No \_iucr\_refine\_instructions\_details in the CIF  
?  
[PLAT007\\_ALERT\\_5\\_G](#) Note: Number of Unrefined D-H Atoms .....  
4  
[PLAT093\\_ALERT\\_1\\_G](#) No su's on H-positions, refinement reported as .  
mixed  
[PLAT194\\_ALERT\\_1\\_G](#) Missing \_cell\_measurement\_reflms\_used datum  
.... ?  
[PLAT195\\_ALERT\\_1\\_G](#) Missing \_cell\_measurement\_theta\_max datum  
.... ?  
[PLAT196\\_ALERT\\_1\\_G](#) Missing \_cell\_measurement\_theta\_min datum  
.... ?  
[PLAT199\\_ALERT\\_1\\_G](#) Check the Reported  
\_cell\_measurement\_temperature 293 K  
[PLAT200\\_ALERT\\_1\\_G](#) Check the Reported  
\_diffn\_ambient\_temperature 293 K  
[PLAT790\\_ALERT\\_4\\_G](#) Centre of Gravity not Within Unit Cell: Resd. #  
2  
C7 H7 N2

---

0 **ALERT level A** = Most likely a serious problem - resolve or explain  
1 **ALERT level B** = A potentially serious problem, consider carefully  
2 **ALERT level C** = Check. Ensure it is not caused by an omission or  
oversight  
9 **ALERT level G** = General information/check it is not something  
unexpected

7 ALERT type 1 CIF construction/syntax error, inconsistent or missing  
data

1 ALERT type 2 Indicator that the structure model may be wrong or  
deficient

0 ALERT type 3 Indicator that the structure quality may be low

2 ALERT type 4 Improvement, methodology, query or suggestion

2 ALERT type 5 Informative message, check

---

---

It is advisable to attempt to resolve as many as possible of the alerts in all categories. Often the minor alerts point to easily fixed oversights, errors and omissions in your CIF or refinement strategy, so attention to these fine details can be worthwhile. In order to resolve some of the more serious problems it may be necessary to carry out additional measurements or structure refinements. However, the purpose of your study may justify the reported deviations and the more serious of these should normally be commented upon in the discussion or experimental section of a paper or in the "special\_details" fields of the CIF. checkCIF was carefully designed to identify outliers and unusual parameters, but every test has its limitations and alerts that are not important in a particular case may appear. Conversely, the absence of alerts does not guarantee there are no aspects of the results needing attention. It is up to the individual to critically assess their own results and, if necessary, seek expert advice.

#### **Publication of your CIF in IUCr journals**

A basic structural check has been run on your CIF. These basic checks will be run on all CIFs submitted for publication in IUCr journals (*Acta Crystallographica*, *Journal of Applied Crystallography*, *Journal of Synchrotron Radiation*); however, if you intend to submit to *Acta Crystallographica Section C* or *E*, you should make sure that [full publication checks](#) are run on the final version of your CIF prior to submission.

#### **Publication of your CIF in other journals**

Please refer to the *Notes for Authors* of the relevant journal for any special instructions relating to CIF submission.

---

**PLATON version of 05/11/2012; check.def file version of 05/11/2012**

## **Datablock A1B1 - ellipsoid plot**

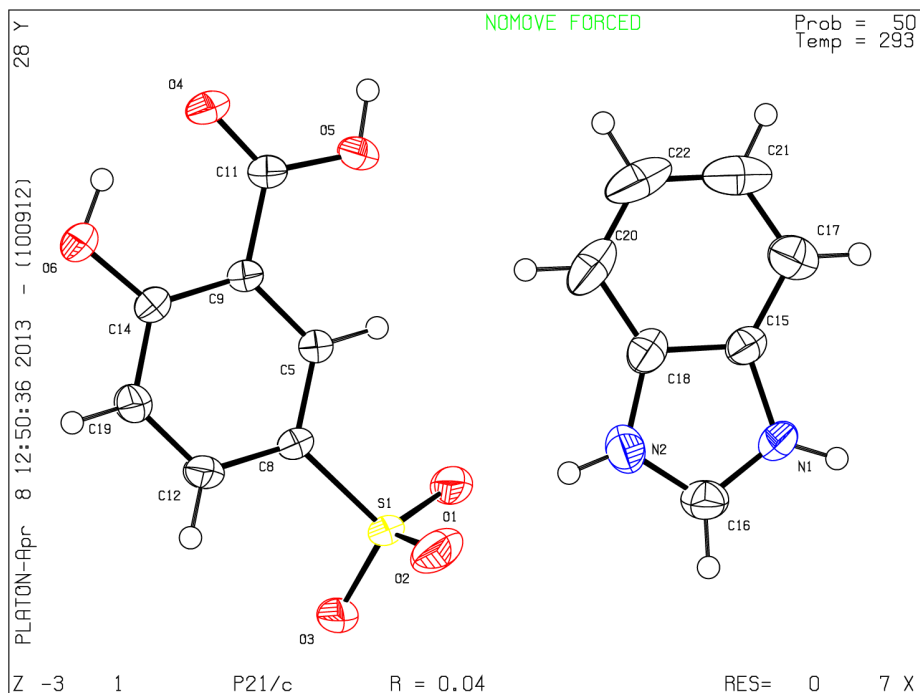

---

[Download CIF editor \(pubCIF\) from the IUCr](#)  
[Download CIF editor \(enCIFer\) from the CCDC](#)  
[Test a new CIF entry](#)

## checkCIF/PLATON (standard)

---

Structure factors have been supplied for datablock(s) shelx

No syntax errors found. [CIF dictionary](#)  
Please wait while processing .... [Interpreting this report](#)

### Datablock: A1B2.H2O

---

Bond precision: C-C = 0.0040 Å Wavelength=0.71073

Cell: a=9.924 (8) b=9.781 (6) c=22.976 (16)

alpha=90 beta=102.64 (3) gamma=90

Temperature: 293 K

|                        | Calculated                    | Reported                        |
|------------------------|-------------------------------|---------------------------------|
| Volume                 | 2176(3)                       | 2176(3)                         |
| Space group            | P 21/c                        | P21/c                           |
| Hall group             | -P 2ybc                       | ?                               |
| Moiety formula         | C7 H4 O6 S, 2(C7 H7 N2), H2 O | ?                               |
| Sum formula            | C21 H20 N4 O7 S               | C21 H20 N4 O7 S                 |
| Mr                     | 472.48                        | 472.48                          |
| Dx, g cm <sup>-3</sup> | 1.442                         | 1.442                           |
| Z                      | 4                             | 4                               |
| Mu (mm <sup>-1</sup> ) | 0.201                         | 0.201                           |
| F000                   | 984.0                         | 984.0                           |
| F000'                  | 985.00                        |                                 |
| h, k, lmax             | 13, 12, 30                    | 13, 12, 30                      |
| Nref                   | 5240                          | 5195                            |
| Tmin, Tmax             | 0.961, 0.961                  |                                 |
| Tmin'                  | 0.961                         |                                 |
| Correction method=     | Not given                     |                                 |
| Data completeness=     | 0.991                         | Theta(max)= 28.010              |
| R(reflections)=        | 0.0510( 2742)                 | wR2(reflections)= 0.1574( 5195) |
| S =                    | 0.965                         | Npar= 310                       |

---

The following ALERTS were generated. Each ALERT has the format  
**test-name\_ALERT\_alert-type\_alert-level**.  
Click on the hyperlinks for more details of the test.

---

### Alert level B

[PLAT052\\_ALERT\\_1\\_B](#) Info on Absorption Correction Method Missing ...  
?

---

### Alert level C

[PLAT241\\_ALERT\\_2\\_C](#) Check High Ueq as Compared to Neighbors for C12  
[PLAT242\\_ALERT\\_2\\_C](#) Check Low Ueq as Compared to Neighbors for S1  
[PLAT245\\_ALERT\\_2\\_C](#) U(iso) H2W Smaller than U(eq) O1W by ...  
0.022 AngSq

[PLAT355 ALERT 3 C](#) Long O-H Bond (0.82A) O4 - H4 ...  
1.01 Ang.  
[PLAT790 ALERT 4 C](#) Centre of Gravity not Within Unit Cell: Resd. #  
1  
C7 H4 O6 S

---

## ●Alert level G

[PLAT005 ALERT 5 G](#) No \_iucr\_refine\_instructions\_details in the CIF  
?  
[PLAT007 ALERT 5 G](#) Note: Number of Unrefined D-H Atoms .....  
4  
[PLAT194 ALERT 1 G](#) Missing \_cell\_measurement\_reflns\_used datum  
.... ?  
[PLAT195 ALERT 1 G](#) Missing \_cell\_measurement\_theta\_max datum  
.... ?  
[PLAT196 ALERT 1 G](#) Missing \_cell\_measurement\_theta\_min datum  
.... ?  
[PLAT199 ALERT 1 G](#) Check the Reported  
\_cell\_measurement\_temperature 293 K  
[PLAT200 ALERT 1 G](#) Check the Reported  
\_diffn\_ambient\_temperature 293 K  
[PLAT790 ALERT 4 G](#) Centre of Gravity not Within Unit Cell: Resd. #  
2  
C7 H7 N2

---

0 **ALERT level A** = Most likely a serious problem - resolve or explain  
1 **ALERT level B** = A potentially serious problem, consider carefully  
5 **ALERT level C** = Check. Ensure it is not caused by an omission or oversight  
8 **ALERT level G** = General information/check it is not something unexpected

6 ALERT type 1 CIF construction/syntax error, inconsistent or missing data

3 ALERT type 2 Indicator that the structure model may be wrong or deficient

1 ALERT type 3 Indicator that the structure quality may be low

2 ALERT type 4 Improvement, methodology, query or suggestion

2 ALERT type 5 Informative message, check

---

**PLATON version of 05/11/2012; check.def file version of 05/11/2012**

# Datablock shelx - ellipsoid plot

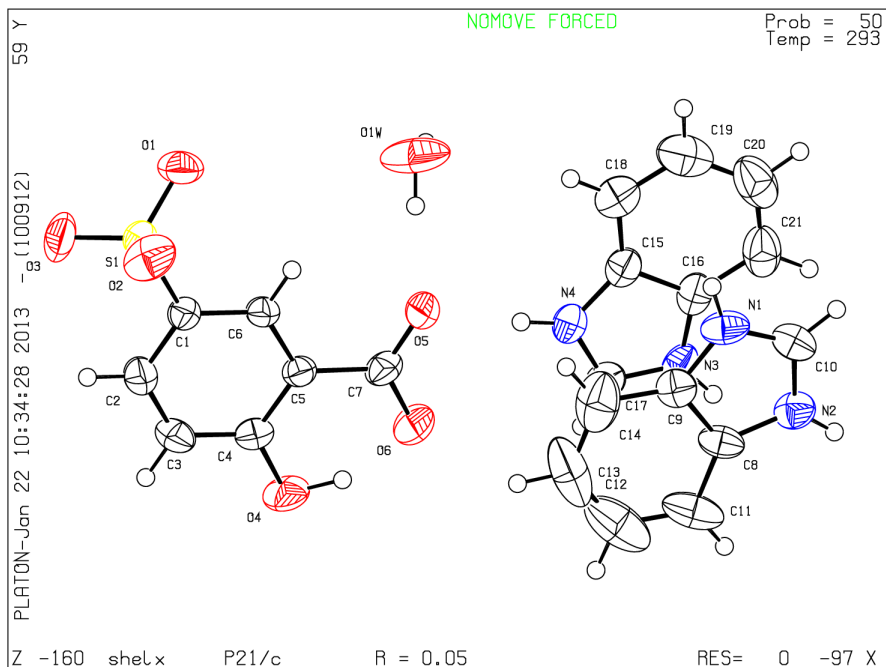

## checkCIF/PLATON (standard)

---

Structure factors have been supplied for datablock(s) mono\_2

No syntax errors found.

Please wait while processing ....

[report](#)

[CIF dictionary](#)

[Interpreting this](#)

## Datablock: A1B2

---

Bond precision: C-C = 0.0061 Å Wavelength=1.54178

Cell: a=21.4632 (18) b=5.7527 (5) c=18.1385 (15)

alpha=90 beta=114.205 (6) gamma=90

Temperature: 298 K

Calculated

Reported

|                               |                         |                                 |
|-------------------------------|-------------------------|---------------------------------|
| Volume                        | 2042.7 (3)              | 2042.7 (3)                      |
| Space group                   | P 21/c                  | P21/c                           |
| Hall group                    | -P 2ybc                 | ?                               |
| Moiety formula                | C7 H4 O6 S, 2(C7 H7 N2) | ?                               |
| Sum formula                   | C21 H18 N4 O6 S         | C21 H18 N4 O6 S                 |
| Mr                            | 454.46                  | 454.45                          |
| Dx, g cm <sup>-3</sup>        | 1.478                   | 1.478                           |
| Z                             | 4                       | 4                               |
| Mu (mm <sup>-1</sup> )        | 1.838                   | 1.838                           |
| F000                          | 944.0                   | 944.0                           |
| F000'                         | 948.37                  |                                 |
| h, k, lmax                    | 25, 6, 21               | 25, 6, 20                       |
| Nref                          | 3607                    | 3397                            |
| Tmin, Tmax                    | 0.863, 0.929            | 0.861, 0.933                    |
| Tmin'                         | 0.863                   |                                 |
| Correction method= MULTI-SCAN |                         |                                 |
| Data completeness=            | 0.942                   | Theta (max)= 66.610             |
| R(reflections)=               | 0.0576( 1715)           | wR2(reflections)= 0.1629( 3397) |
| S =                           | 1.003                   | Npar= 296                       |

---

The following ALERTS were generated. Each ALERT has the format  
**test-name\_ALERT\_alert-type\_alert-level**.  
Click on the hyperlinks for more details of the test.

---

### Alert level B

[PLAT029\\_ALERT\\_3\\_B](#) \_diffn\_measured\_fraction\_theta\_full Low  
..... 0.942  
[PLAT230\\_ALERT\\_2\\_B](#) Hirshfeld Test Diff for S1 -- O1 ..  
7.5 su

---

### Alert level C

[ABSTY02\\_ALERT\\_1\\_C](#) An \_exptl\_absorpt\_correction\_type has been  
given without  
a literature citation. This should be contained in the  
\_exptl\_absorpt\_process\_details field.  
Absorption correction given as multi-scan  
[REFLT03\\_ALERT\\_3\\_C](#) Reflection count < 95% complete

From the CIF: `_diffn_reflns_theta_max` 66.61  
From the CIF: `_diffn_reflns_theta_full` 66.61  
From the CIF: `_reflns_number_total` 3397  
TEST2: Reflns within `_diffn_reflns_theta_max`  
Count of symmetry unique reflns 3607  
Completeness (`_total/calc`) 94.18%

[PLAT340 ALERT 3 C](#) Low Bond Precision on C-C Bonds .....  
0.0061 Ang

---

## ● Alert level G

[PLAT005 ALERT 5 G](#) No `_iucr_refine_instructions_details` in the CIF  
?

[PLAT007 ALERT 5 G](#) Note: Number of Unrefined D-H Atoms  
..... 3

[PLAT194 ALERT 1 G](#) Missing `_cell_measurement_reflns_used`  
datum .... ?

[PLAT195 ALERT 1 G](#) Missing `_cell_measurement_theta_max`  
datum .... ?

[PLAT196 ALERT 1 G](#) Missing `_cell_measurement_theta_min`  
datum .... ?

---

0 **ALERT level A** = Most likely a serious problem - resolve or explain

2 **ALERT level B** = A potentially serious problem, consider carefully

3 **ALERT level C** = Check. Ensure it is not caused by an omission or oversight

5 **ALERT level G** = General information/check it is not something unexpected

4 ALERT type 1 CIF construction/syntax error, inconsistent or missing data

1 ALERT type 2 Indicator that the structure model may be wrong or deficient

3 ALERT type 3 Indicator that the structure quality may be low

0 ALERT type 4 Improvement, methodology, query or suggestion

2 ALERT type 5 Informative message, check

---

PLATON version of 05/11/2012; check.def file version of 05/11/2012

## Datablock A1B2 - ellipsoid plot



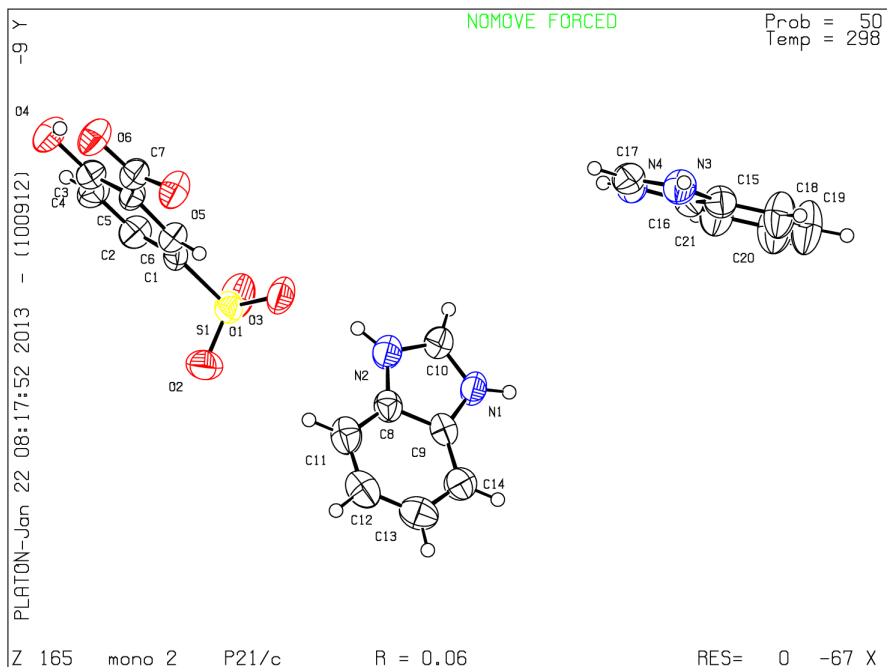

---

[Download CIF editor \(pubCIF\) from the IUCr](#)  
[Download CIF editor \(enCIFer\) from the CCDC](#)  
[Test a new CIF entry](#)
